# Supplementary material
Source: MDPI journal article supplement (https://www.mdpi.com/2071-1050/15/2/1681)
Supplement: s1 [file s1]

# Economic performance of dairy sheep farms in less-favored areas of Greece: A comparative analysis based on flock size and farming system

**Table S1.** Descriptive statistics (mean and standard deviation) of collected technical farm data for each studied period.

| Trait                                   | Period    | N  | Mean  | SD <sup>1</sup> |
|-----------------------------------------|-----------|----|-------|-----------------|
| Ewes milked                             | 2019-2020 | 19 | 173.8 | 60.98           |
|                                         | 2020-2021 | 26 | 189.3 | 82.8            |
| Ewes non milked                         | 2019-2020 | 19 | 25.8  | 22.84           |
|                                         | 2020-2021 | 26 | 27.0  | 25.25           |
| Rams                                    | 2019-2020 | 19 | 9.5   | 4.89            |
|                                         | 2020-2021 | 26 | 9.4   | 4.38            |
| Lambs                                   | 2019-2020 | 19 | 48.0  | 32.98           |
|                                         | 2020-2021 | 26 | 54.4  | 33.64           |
| Lambs slaughtered                       | 2019-2020 | 19 | 197.8 | 112.96          |
|                                         | 2020-2021 | 26 | 174.2 | 116.89          |
| Adult sheep slaughtered                 | 2019-2020 | 19 | 41.4  | 46.35           |
|                                         | 2020-2021 | 26 | 30.9  | 23.69           |
| Lambs sold                              | 2019-2020 | 19 | 0.9   | 3.90            |
|                                         | 2020-2021 | 26 | 1.6   | 7.84            |
| Milk production (kg/ewe/milking period) | 2019-2020 | 19 | 218.5 | 88.71           |
|                                         | 2020-2021 | 26 | 238.6 | 91.76           |
| Milking period (months)                 | 2019-2020 | 19 | 8.9   | 9.51            |
|                                         | 2020-2021 | 26 | 8.7   | 1.00            |
| Fat content (%)                         | 2019-2020 | 19 | 6.4   | 0.66            |
|                                         | 2020-2021 | 26 | 6.4   | 0.90            |
| Protein content (%)                     | 2019-2020 | 19 | 5.6   | 0.21            |
|                                         | 2020-2021 | 26 | 5.3   | 0.66            |
| Milk price (€/kg)                       | 2019-2020 | 19 | 0.8   | 0.02            |
|                                         | 2020-2021 | 26 | 0.9   | 0.08            |
| Lamb carcass weight (kg)                | 2019-2020 | 19 | 9.5   | 1.12            |
|                                         | 2020-2021 | 26 | 9.5   | 1.39            |
| Lamb carcass price (€/kg)               | 2019-2020 | 19 | 4.5   | 0.45            |
|                                         | 2020-2021 | 26 | 4.9   | 0.76            |
| Adult carcass price (€/kg)              | 2019-2020 | 19 | 1.6   | 0.34            |
|                                         | 2020-2021 | 26 | 2.1   | 0.38            |
| Weight at weaning (kg)                  | 2019-2020 | 19 | 15.6  | 1.74            |
|                                         | 2020-2021 | 26 | 16.0  | 2.50            |
| Age at weaning (months)                 | 2019-2020 | 19 | 1.9   | 0.96            |
|                                         | 2020-2021 | 26 | 1.7   | 0.47            |
| Grazing area (hectares)                 | 2019-2020 | 19 | 13.5  | 8.18            |
|                                         | 2020-2021 | 26 | 45.1  | 43.00           |
| Grazing time (hours)                    | 2019-2020 | 19 | 5.8   | 1.97            |
|                                         | 2020-2021 | 26 | 6.4   | 2.50            |
| Grazing distance (km)                   | 2019-2020 | 19 | 3.2   | 2.04            |
|                                         | 2020-2021 | 26 | 3.1   | 2.42            |
| Concentrate for lambs (kg/day)          | 2019-2020 | 19 | 0.6   | 0.11            |

|                                                  |           |    |     |      |
|--------------------------------------------------|-----------|----|-----|------|
|                                                  | 2020-2021 | 26 | 0.7 | 0.26 |
| Concentrate for milked ewes (kg/day)             | 2019-2020 | 19 | 1.0 | 0.21 |
|                                                  | 2020-2021 | 26 | 1.0 | 0.22 |
| Concentrate for dry period (kg/day)              | 2019-2020 | 19 | 0.5 | 0.23 |
|                                                  | 2020-2021 | 26 | 0.5 | 0.19 |
| Concentrate for last month before birth (kg/day) | 2019-2020 | 19 | 0.8 | 0.16 |
|                                                  | 2020-2021 | 26 | 0.7 | 0.20 |
| Concentrate for non-milked ewes (kg/day)         | 2019-2020 | 19 | 0.5 | 0.23 |
|                                                  | 2020-2021 | 26 | 0.5 | 0.21 |
| Concentrate for rams (kg/day)                    | 2019-2020 | 19 | 0.6 | 0.25 |
|                                                  | 2020-2021 | 26 | 0.8 | 0.43 |
| Hay for lambs (kg/day)                           | 2019-2020 | 19 | 0.7 | 0.22 |
|                                                  | 2020-2021 | 26 | 0.7 | 0.62 |
| Hay for milked ewes (kg/day)                     | 2019-2020 | 19 | 1.5 | 0.55 |
|                                                  | 2020-2021 | 26 | 1.3 | 0.41 |
| Hay for dry period (kg/day)                      | 2019-2020 | 19 | 0.8 | 0.35 |
|                                                  | 2020-2021 | 26 | 0.8 | 0.6  |
| Hay for non-milked ewes (kg/day)                 | 2019-2020 | 19 | 1.1 | 0.35 |
|                                                  | 2020-2021 | 26 | 0.7 | 0.63 |
| Hay for rams (kg/day)                            | 2019-2020 | 19 | 0.8 | 0.30 |
|                                                  | 2020-2021 | 26 | 0.7 | 0.58 |

<sup>1</sup>SD = standard deviation.

**Table S2.** Descriptive statistics (mean and standard deviation) of collected economic farm data for each studied period.

| <b>Trait</b>                     | <b>Period</b> | <b>N</b> | <b>Mean</b> | <b>SD<sup>1</sup></b> |
|----------------------------------|---------------|----------|-------------|-----------------------|
| Subsidy income (€/year)          | 2019-2020     | 19       | 9,568.4     | 8,064.33              |
|                                  | 2020-2021     | 26       | 11,896.2    | 10616.9               |
| Cost of labour (€/hour)          | 2019-2020     | 19       | 1.8         | 1.34                  |
|                                  | 2020-2021     | 26       | 3.5         | 0.75                  |
| Cost of seasonal labour (€/year) | 2019-2020     | 19       | 89.7        | 390.01                |
|                                  | 2020-2021     | 26       | 353.9       | 1,295.29              |
| Hectares of area rented (€/year) | 2019-2020     | 19       | 8.5         | 10.84                 |
|                                  | 2020-2021     | 26       | 17.1        | 23.31                 |
| Transportation costs (€/year)    | 2019-2020     | 19       | 2,984.2     | 4,271.65              |
|                                  | 2020-2021     | 26       | 4,173.1     | 3,528.24              |
| Utility costs (€/year)           | 2019-2020     | 19       | 962.11      | 982.23                |
|                                  | 2020-2021     | 26       | 1,731.4     | 2,009.78              |
| Milking parlour costs (€/year)   | 2019-2020     | 19       | 497.4       | 610.66                |
|                                  | 2020-2021     | 26       | 979.6       | 1,020.69              |
| Veterinary costs (€/animal)      | 2019-2020     | 19       | 4.5         | 2.62                  |
|                                  | 2020-2021     | 26       | 5.6         | 2.50                  |
| Grazing land costs (€/year)      | 2019-2020     | 19       | 550.0       | 729.38                |
|                                  | 2020-2021     | 26       | 454.1       | 648.73                |
| Milk price (€/kg)                | 2019-2020     | 19       | 0.8         | 0.02                  |
|                                  | 2020-2021     | 26       | 0.9         | 0.08                  |

|                                                      |           |    |     |      |
|------------------------------------------------------|-----------|----|-----|------|
| Lamb carcass price (€/kg)                            | 2019-2020 | 19 | 4.5 | 0.45 |
|                                                      | 2020-2021 | 26 | 4.9 | 0.76 |
| Adult carcass price (€/kg)                           | 2019-2020 | 19 | 1.6 | 0.34 |
|                                                      | 2020-2021 | 26 | 2.1 | 0.38 |
| Concentrate for lambs price (€/kg)                   | 2019-2020 | 19 | 0.3 | 0.06 |
|                                                      | 2020-2021 | 26 | 0.3 | 0.05 |
| Concentrate for lactation period price (€/kg)        | 2019-2020 | 19 | 0.4 | 0.05 |
|                                                      | 2020-2021 | 26 | 0.4 | 0.05 |
| Concentrate for dry period price (€/kg)              | 2019-2020 | 19 | 0.3 | 0.07 |
|                                                      | 2020-2021 | 26 | 0.3 | 0.05 |
| Concentrate for last month before birth price (€/kg) | 2019-2020 | 19 | 0.3 | 0.06 |
|                                                      | 2020-2021 | 26 | 0.3 | 0.06 |
| Concentrate for rams price (€/kg)                    | 2019-2020 | 19 | 0.3 | 0.06 |
|                                                      | 2020-2021 | 26 | 0.3 | 0.07 |
| Hay price (€/kg)                                     | 2019-2020 | 19 | 0.1 | 0.03 |
|                                                      | 2020-2021 | 26 | 0.3 | 0.28 |
| Straw price (€/kg)                                   | 2019-2020 | 19 | 0.1 | 0.01 |
|                                                      | 2020-2021 | 26 | 0.1 | 0.00 |

<sup>1</sup>SD = standard deviation.

**Table S3.** Effects (mean and standard deviation,  $\beta$ -coefficient, standard error) of flock size on farm economic performance traits for each studied period.

|                          | Period         | Smaller farms <sup>3</sup> | Larger farms <sup>4</sup> | $\beta$ -coefficient     | P-Value |
|--------------------------|----------------|----------------------------|---------------------------|--------------------------|---------|
| Gross margin (€)         | 1 <sup>1</sup> | -1,187.1<br>(4,997.31)     | 12,801.7<br>(4,261.72)    | -13,988.8<br>(6,567.76)  | 0.0481  |
|                          | 2 <sup>2</sup> | 6571.0<br>(7,880.00)       | 20,593.0<br>(5734.00)     | -14,022.0<br>(9,746.00)  | 0.1631  |
| Gross margin per ewe (€) | 1              | -10.6<br>(19.39)           | 49.6<br>(16.54)           | -60.2<br>(25.49)         | 0.0304  |
|                          | 2              | 52.6<br>(31.10)            | 74.4<br>(22.60)           | -21.8<br>(38.40)         | 0.5700  |
| Income (€)               | 1              | 28,980.7<br>(9,013.86)     | 70,963.1<br>(7,687.05)    | -41,982.4<br>(11,846.54) | 0.0025  |
|                          | 2              | 35,544.0<br>(11,687.0)     | 82,571.0<br>(8,503.0)     | -47,027.0<br>(14,453.0)  | 0.0034  |
| Income from milk (%)     | 1              | 54.9<br>(3.45)             | 60.8<br>(2.94)            | -5.9<br>(4.54)           | 0.2110  |
|                          | 2              | 62.2<br>(3.97)             | 66.2<br>(2.89)            | -4.0<br>(4.91)           | 0.4215  |
| Income from meat (%)     | 1              | 22.0<br>(3.76)             | 22.8<br>(3.21)            | -0.8<br>(4.94)           | 0.8778  |
|                          | 2              | 17.8<br>(2.59)             | 16.7<br>(1.88)            | 1.1<br>(3.20)            | 0.7324  |
| Income from subsidy (%)  | 1              | 23.1<br>(3.68)             | 16.3<br>(3.14)            | 6.8<br>(4.83)            | 0.1751  |

|                                          |   |                        |                        |                         |        |
|------------------------------------------|---|------------------------|------------------------|-------------------------|--------|
|                                          | 2 | 19.4<br>(4.48)         | 17.1<br>(3.26)         | 2.3<br>(5.53)           | 0.6805 |
| Variable costs (€)                       | 1 | 30,167.8<br>(6,367.4)  | 58,161.4<br>(5,430.14) | -27,993.6<br>(8,368.41) | 0.0038 |
|                                          | 2 | 28,972.1<br>(7,326.10) | 61,977.1<br>(5,331.10) | -33,005.0<br>(9,060.0)  | 0.0013 |
| Variable costs per<br>milked ewe (€)     | 1 | 204.6<br>(22.97)       | 221.9<br>(19.60)       | -17.3<br>(30.19)        | 0.5745 |
|                                          | 2 | 224.0<br>(34.9)        | 205.0<br>(25.40)       | 19.4<br>(43.20)         | 0.6579 |
| Variable costs per<br>not milked ewe (€) | 1 | 105.1<br>(21.02)       | 105.9<br>(17.93)       | -0.8<br>(27.6)          | 0.9779 |
|                                          | 2 | 163.0<br>(34.10)       | 140.0<br>(24.10)       | 22.8<br>(41.8)          | 0.5912 |
| Variable costs per<br>ram (€)            | 1 | 108.9<br>(14.59)       | 146.5<br>(12.40)       | -37.6<br>(19.18)        | 0.0668 |
|                                          | 2 | 190.0<br>(39.50)       | 169.0<br>(28.70)       | 21.0<br>(48.80)         | 0.6712 |
| Variable costs per<br>lamb (€)           | 1 | 82.2<br>(9.87)         | 84.2<br>(8.42)         | -2.0<br>(12.97)         | 0.8776 |
|                                          | 2 | 144.0<br>(34.90)       | 111.0<br>(21.20)       | 32.7<br>(37.50)         | 0.3918 |
| Feed costs per<br>milked ewe (€)         | 1 | 174.1<br>(18.70)       | 189.9<br>(15.95)       | -15.9<br>(24.58)        | 0.5266 |
|                                          | 2 | 147.0<br>(14.30)       | 159.0<br>(15.40)       | -12.0<br>(17.70)        | 0.5047 |
| Feed costs per not<br>milked ewe (€)     | 1 | 74.6<br>(15.25)        | 76.6<br>(13.01)        | -2.0<br>(20.05)         | 0.9202 |
|                                          | 2 | 84.0<br>(14.60)        | 93.0<br>(10.30)        | -9.0<br>(17.90)         | 0.6202 |
| Feed costs per ram<br>(€)                | 1 | 78.5<br>(13.77)        | 114.6<br>(11.75)       | -36.2<br>(18.10)        | 0.0620 |
|                                          | 2 | 113.0<br>(19.90)       | 123<br>(14.50)         | -10.3<br>(24.7)         | 0.6794 |
| Feed costs per lamb<br>(€)               | 1 | 51.5<br>(3.29)         | 52.4<br>(2.80)         | -0.9<br>(4.32)          | 0.8402 |
|                                          | 2 | 58.7<br>(7.49)         | 65.2<br>(5.14)         | -6.5<br>(9.08)          | 0.4809 |
| Feeding costs (%)                        | 1 | 83.4<br>(3.24)         | 83.8<br>(2.76)         | -0.4<br>(4.26)          | 0.9211 |
|                                          | 2 | 72.9<br>(4.61)         | 75.6<br>(3.35)         | -2.7<br>(5.70)          | 0.6415 |
| Labour costs (%)                         | 1 | 0.1<br>(0.95)          | 1.5<br>(0.81)          | -1.5<br>(1.25)          | 0.2417 |
|                                          | 2 | 0.6 (1.91)             | 3.3<br>(1.4)           | -2.7<br>(2.36)          | 0.2612 |
| Renting costs (%)                        | 1 | 1.8<br>(1.08)          | 3.9<br>(0.92)          | -2.1<br>(1.42)          | 0.1529 |
|                                          | 2 | 5.4<br>(2.54)          | 4.4<br>(1.85)          | 3.1<br>(0.99)           | 0.7539 |
| Transportation<br>costs (%)              | 1 | 6.1<br>(2.16)          | 5.3<br>(1.84)          | 0.9<br>(2.84)           | 0.7569 |
|                                          | 2 | 7.9<br>(1.96)          | 8.4<br>(1.42)          | -0.5<br>(2.42)          | 0.8511 |
| Utility costs (%)                        | 1 | 3.8                    | 1.2                    | 2.6                     | 0.0157 |

|                           |   |        |        |        |        |
|---------------------------|---|--------|--------|--------|--------|
|                           |   | (0.71) | (0.63) | (0.97) |        |
|                           | 2 | 5.0    | 2.6    | 2.4    | 0.0518 |
|                           |   | (0.96) | (0.70) | (1.19) |        |
| Milking parlour costs (%) | 1 | 1.7    | 0.6    | 1.1    | 0.0722 |
|                           |   | (0.43) | (0.37) | (0.57) |        |
|                           | 2 | 2.7    | 1.5    | 1.2    | 0.1507 |
|                           |   | (0.65) | (0.48) | (0.81) |        |
| Veterinary costs (%)      | 1 | 2.2    | 2.8    | -0.6   | 0.4174 |
|                           |   | (0.51) | (0.43) | (0.67) |        |
|                           | 2 | 3.1    | 3.4    | -0.32  | 0.6187 |
|                           |   | (0.51) | (0.37) | (0.63) |        |
| Grazing land costs (%)    | 1 | 1.0    | 1.0    | 0.03   | 0.9605 |
|                           |   | (0.50) | (0.43) | (0.66) |        |
|                           | 2 | 1.9    | 0.4    | 1.5    | 0.0387 |
|                           |   | (0.53) | (0.39) | (0.65) |        |

<sup>1</sup>1= 2019-2020, <sup>2</sup>2= 2020-2021, <sup>3</sup>Smaller farms= ≤150 ewes, <sup>4</sup>Larger farms= > 150 ewes.

**Table S4.** Effects (mean and standard deviation,  $\beta$ -coefficient, standard error) of farming system on farm economic performance traits for each studied period.

|                                   | Period         | Intensive/semi-intensive farms | Semi-extensive farms   | $\beta$ -coefficient    | P-Value |
|-----------------------------------|----------------|--------------------------------|------------------------|-------------------------|---------|
| Gross margin (€)                  | 1 <sup>1</sup> | 14,459.3<br>(5,084.21)         | 1,422.4<br>(4,335.83)  | 13,036.9<br>(6,681.97)  | 0.0677  |
|                                   | 2 <sup>2</sup> | 27,871.0<br>(7,621.00)         | 9,317.0<br>(5,545.00)  | 18,553.<br>(9,425.00)   | 0.0607  |
| Gross margin per ewe (€)          | 1              | 47.6<br>(21.07)                | 7.3<br>(17.97)         | 40.3<br>(27.7)          | 0.1640  |
|                                   | 2              | 111.3<br>(29.2)                | 43.3<br>(21.2)         | 68.0<br>(36.10)         | 0.0720  |
| Income (€)                        | 1              | 77,960.2<br>(8,911.60)         | 35,341.6<br>(7,599.85) | 42,618.6<br>(11,712.15) | 0.0020  |
|                                   | 2              | 96,596.0<br>(12,617.10)        | 53,425.0<br>(9,180.10) | 37,171.0<br>(15,603.0)  | 0.025   |
| Income from milk (%)              | 1              | 62.5<br>(3.36)                 | 52.2<br>(2.87)         | 7.2<br>(4.42)           | 0.1202  |
|                                   | 2              | 66.0<br>(4.02)                 | 64.3<br>(2.92)         | 1.7<br>(4.97)           | 0.7367  |
| Income from meat (%)              | 1              | 18.7<br>(3.56)                 | 25.3<br>(3.04)         | -6.5<br>(4.68)          | 0.1781  |
|                                   | 2              | 13.5<br>(2.43)                 | 18.9<br>(1.77)         | -5.4<br>(3.01)          | 0.0836  |
| Income from subsidy (%)           | 1              | 18.6<br>(3.88)                 | 19.5<br>(3.31)         | -0.9<br>(5.11)          | 0.8637  |
|                                   | 2              | 20.5<br>(4.44)                 | 16.5<br>(3.23)         | 4.1<br>(5.49)           | 0.04653 |
| Variable costs (€)                | 1              | 63,500.8<br>(6,118.0)          | 39,919.2<br>(5,217.45) | 29,581.7<br>(8,040.62)  | 0.0020  |
|                                   | 2              | 62,275.0<br>(8,597.00)         | 44,108.0<br>(6,255.00) | 18,618.0<br>(10,632.00) | 0.0927  |
| Variable costs per milked ewe (€) | 1              | 260.6<br>(17.98)               | 181.2<br>(15.33)       | 79.4<br>(23.63)         | 0.037   |
|                                   | 2              | 273.0                          | 180.0                  | 93.0                    | 0.025   |

|                                       |   |         |         |         |        |
|---------------------------------------|---|---------|---------|---------|--------|
|                                       |   | (31.50) | (22.90) | (39.0)  |        |
| Variable costs per not milked ewe (€) | 1 | 132.8   | 85.8    | 47.0    | 0.0796 |
|                                       |   | (19.16) | (16.34) | (25.08) |        |
|                                       | 2 | 207.0   | 123.0   | 83.8    | 0.0470 |
|                                       |   | (33.50) | (21.50) | (39.80) |        |
| Variable costs per ram (€)            | 1 | 139.0   | 124.6   | 14.4    | 0.5019 |
|                                       |   | (15.94) | (13.59) | (20.94) |        |
|                                       | 2 | 241.0   | 143.0   | 98.4    | 0.004  |
|                                       |   | (36.20) | (26.30) | (44.70) |        |
| Variable costs per lamb (€)           | 1 | 100.1   | 71.2    | 28.8    | 0.017  |
|                                       |   | (8.32)  | (7.10)  | (10.94) |        |
|                                       | 2 | 175.5   | 96.5    | 79.0    | 0.031  |
|                                       |   | (28.30) | (19.40) | (34.30) |        |
| Feed costs per milked ewe (€)         | 1 | 211     | 163.1   | 47.9    | 0.044  |
|                                       |   | (16.74) | (14.28) | (22.0)  |        |
|                                       | 2 | 175.0   | 144.0   | 30.8    | 0.0770 |
|                                       |   | (13.52) | (9.84)  | (10.70) |        |
| Feed costs per not milked ewe (€)     | 1 | 83.1    | 70.4    | 12.8    | 0.5280 |
|                                       |   | (15.07) | (12.86) | (19.81) |        |
|                                       | 2 | 95.8    | 87.6    | 8.2     | 0.6620 |
|                                       |   | (15.60) | (10.00) | (18.60) |        |
| Feed costs per ram (€)                | 1 | 89.5    | 106.6   | -17.1   | 0.3986 |
|                                       |   | (14.98) | (12.77) | (19.68) |        |
|                                       | 2 | 143.0   | 107.0   | 36.1    | 0.1400 |
|                                       |   | (19.10) | (13.90) | (23.60) |        |
| Feed costs per lamb (€)               | 1 | 50.3    | 53.3    | -3.0    | 0.4866 |
|                                       |   | (3.24)  | (2.76)  | (4.26)  |        |
|                                       | 2 | 67.5    | 61.1    | 6.3     | 0.4938 |
|                                       |   | (7.49)  | (5.14)  | (9.08)  |        |
| Feeding costs (%)                     | 1 | 77.5    | 88.1    | -10.6   | 0.006  |
|                                       |   | (2.59)  | (2.21)  | (3.40)  |        |
|                                       | 2 | 67.0    | 78.7    | -11.7   | 0.034  |
|                                       |   | (4.21)  | (3.06)  | (5.21)  |        |
| Transportation costs (%)              | 1 | 7.8     | 4.1     | 3.7     | 0.1884 |
|                                       |   | (2.05)  | (1.75)  | (2.70)  |        |
|                                       | 2 | 11.3    | 6.6     | 4.7     | 0.039  |
|                                       |   | (1.79)  | (1.3)   | (2.22)  |        |
| Utility costs (%)                     | 1 | 3.0     | 1.7     | 1.3     | 0.2557 |
|                                       |   | (0.85)  | (0.72)  | (1.11)  |        |
|                                       | 2 | 3.8     | 3.2     | 0.6     | 0.6353 |
|                                       |   | (1.04)  | (0.76)  | (1.28)  |        |
| Milking parlour costs (%)             | 1 | 1.9     | 0.5     | 1.4     | 0.015  |
|                                       |   | (0.40)  | (0.34)  | (0.53)  |        |
|                                       | 2 | 3.2     | 1.2     | 2.0     | 0.010  |
|                                       |   | (0.59)  | (0.43)  | (0.73)  |        |
| Veterinary costs (%)                  | 1 | 3.3     | 2.0     | 1.3     | 0.0556 |
|                                       |   | (0.47)  | (0.40)  | (0.61)  |        |
|                                       | 2 | 3.9     | 3.0     | 0.9     | 0.1547 |
|                                       |   | (0.49)  | (0.36)  | (0.61)  |        |
| Grazing land costs (%)                | 1 | 1.1     | 0.9     | 0.3     | 0.6596 |
|                                       |   | (0.50)  | (0.42)  | (0.65)  |        |
|                                       | 2 | 0.16    | 1.4     | -1.2    | 0.0865 |
|                                       |   | (0.54)  | (0.40)  | (0.67)  |        |

---

<sup>1</sup>1= 2019-2020, <sup>2</sup>2= 2020-2021.
